# Supplementary material
Source: PubMed Central journal article supplement (PMC3791163)
Supplement: NIHMS510565-supplement-01.pdf [file NIHMS510565-supplement-01.pdf]

## Supplementary Data

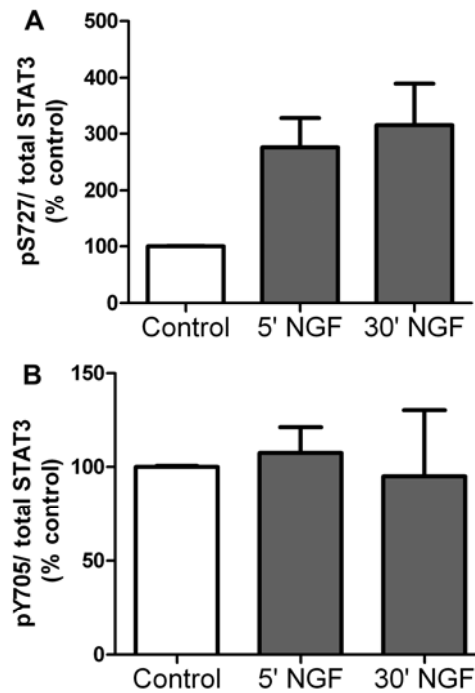

Supplementary Figure 1. NGF stimulates significant phosphorylation of S727 (A) on STAT3, but not Y705 (B). Sympathetic neurons maintained in 10ng/ml NGF were stimulated with NGF (100ng/ml) for the indicated time points and western blotting was performed for phospho-STAT3. The ratio of PhosphoSTAT3/total STAT3 was calculated for each residue for 3 independent experiments and averaged as % of control (Mean  $\pm$  SEM).

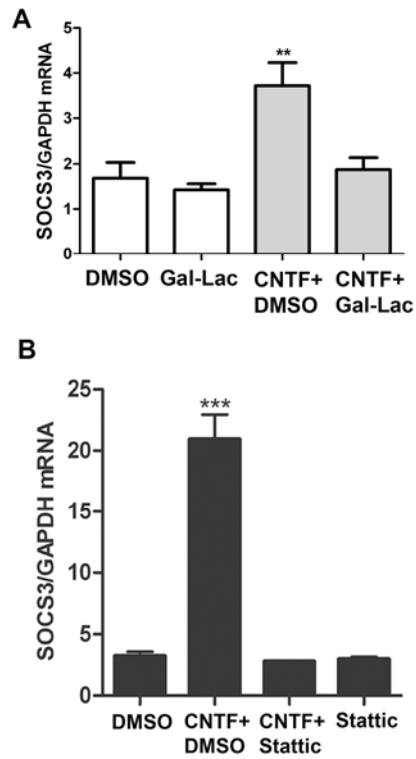

Supplementary Figure 2. Blocking STAT3 DNA binding (A) or phosphorylation (B) prevents STAT3 induction of SOCS3 mRNA in sympathetic neurons. (A) Sympathetic neurons were stimulated with CNTF, with or without the drug Gal-Lac to prevent STAT3 DNA binding, for 6 hrs. SOCS3 mRNA was quantified by real-time PCR and normalized to GAPDH mRNA. Data are expressed as the mean  $\pm$  SEM,  $n=2$ , \*\*  $p<0.01$  compared with control. (B) Sympathetic neurons were stimulated with CNTF, with or without the STAT3 inhibitor Stattic, for 30 min. SOCS3 mRNA was quantified by real-time PCR and normalized to GAPDH mRNA. Data are expressed as the mean  $\pm$  SEM,  $n=3$ , \*\*\*  $p<0.001$  compared with control. Data shown are representative of three independent experiments.
